# Supplementary material for: Bile salt hydrolase in non-enterotoxigenic Bacteroides potentiates colorectal cancer
Source: PubMed Central journal article supplement (PMC9918522; doi:10.1038/s41467-023-36089-9), 2023-02-10
Supplement: 41467_2023_36089_MOESM1_ESM.pdf [file 41467_2023_36089_MOESM1_ESM.pdf]

## Supplementary Information file

### Bile salt hydrolase in non-enterotoxigenic *Bacteroides* potentiates colorectal cancer

Lulu Sun<sup>1,6</sup>, Yi Zhang<sup>2,6</sup>, Jie Cai<sup>1</sup>, Bipin Rimal<sup>3</sup>, Edson R. Rocha<sup>4</sup>, James P. Coleman<sup>4</sup>, Chenran Zhang<sup>5</sup>, Robert G. Nichols<sup>3</sup>, Yuhong Luo<sup>1</sup>, Bora Kim<sup>1</sup>, Yaozong Chen<sup>1</sup>, Kristopher W. Krausz<sup>1</sup>, Curtis C. Harris<sup>5</sup>, Andrew D. Patterson<sup>3\*</sup>, Zhipeng Zhang<sup>2\*</sup>, Shogo Takahashi<sup>1\*</sup>, Frank J. Gonzalez<sup>1\*</sup>

<sup>1</sup>Laboratory of Metabolism, Center for Cancer Research, National Cancer Institute, Bethesda, MD 20892, USA.

<sup>2</sup>Department of General Surgery, Cancer Center, Peking University Third Hospital, Beijing 100191, China.

<sup>3</sup>Center for Molecular Toxicology and Carcinogenesis, Department of Veterinary & Biomedical Sciences, Pennsylvania State University, University Park, PA 16802, USA.

<sup>4</sup>Department of Microbiology and Immunology, Brody School of Medicine, East Carolina University, Greenville, NC 27834, USA.

<sup>5</sup>Laboratory of Human Carcinogenesis, Center for Cancer Research, National Cancer Institute, Bethesda, MD 20892, USA.

<sup>6</sup>These authors contributed equally.

\*Correspondence: F.J.G. ([gonzalef@mail.nih.gov](mailto:gonzalef@mail.nih.gov)); S.T. ([shogo.takahashi@nih.gov](mailto:shogo.takahashi@nih.gov)); Z.Z. ([zhangzhipeng06@126.com](mailto:zhangzhipeng06@126.com)); A.D.P. ([adp117@psu.edu](mailto:adp117@psu.edu))

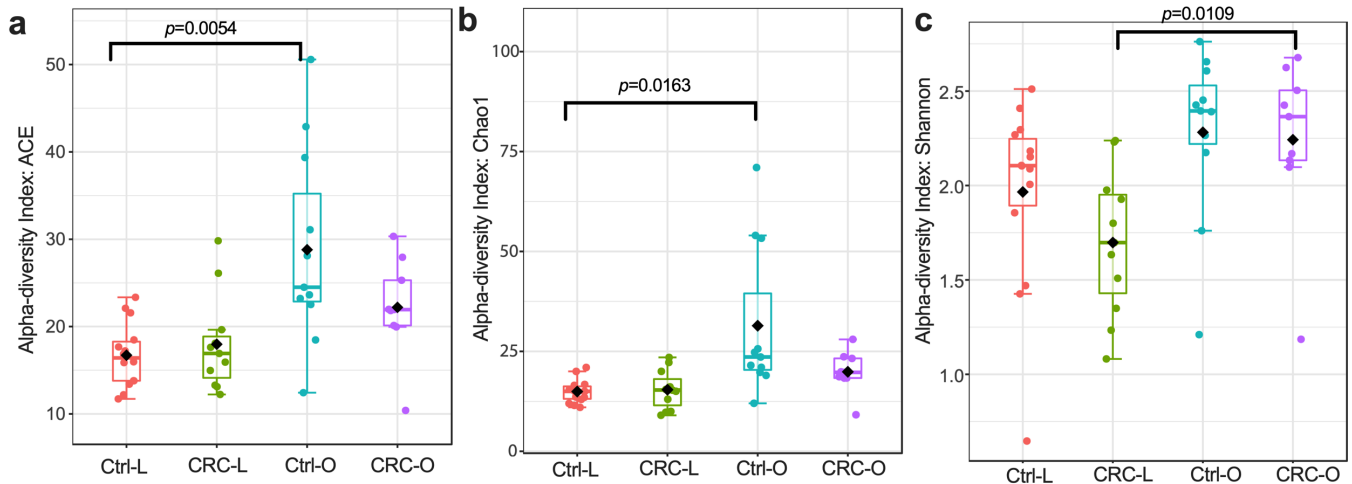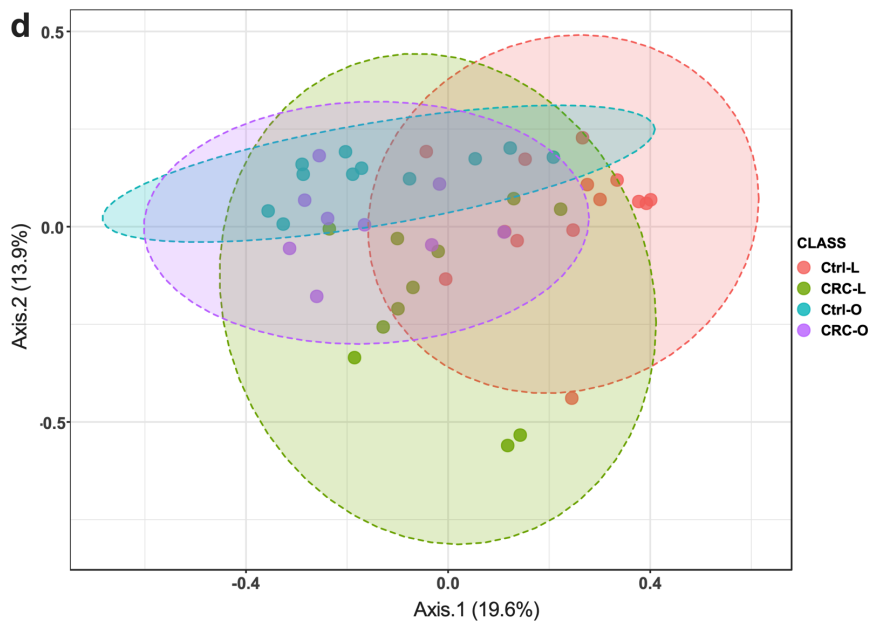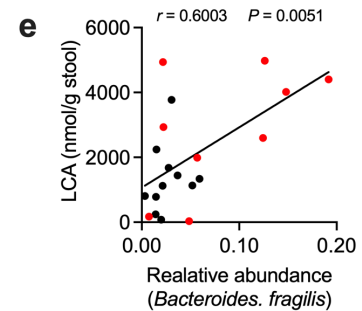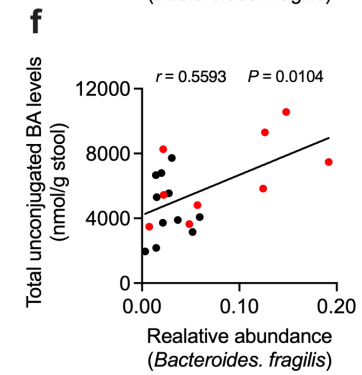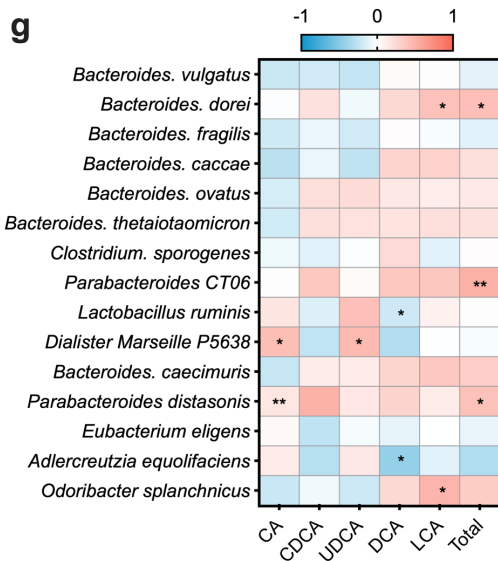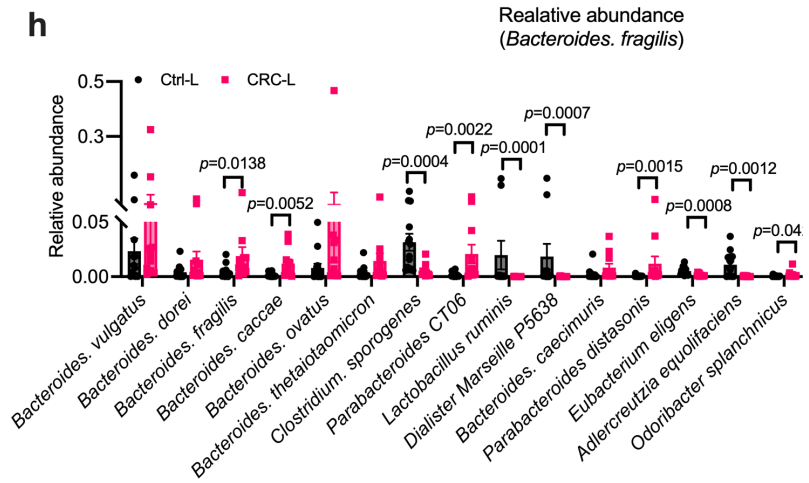

**Supplementary Figure 1: BSH-producing *Bacteroides* were enriched in CRC patients with overweight, refers to Fig. 1**

**a-h** Stool samples were collected from 45 individuals [14 for control lean group (Ctrl-L); 11 for CRC lean group (CRC-L); 11 for control overweight group (Ctrl-O); 9 for CRC overweight group (CRC-O)] for shotgun metagenomics and bile acid analysis. **a-c**  $\alpha$ -diversity of the gut microbiota among four groups, as indicated by the ACE (**a**), Chao1 (**b**) and Shannon indices (**c**). One-way ANOVA with Tukey's post hoc test. **d** Partial least squares discriminant analysis (PLS-DA) using the Bray-Curtis distance. **e, f** Correlative analysis of *B. fragilis* with stool LCA (**e**) and total unconjugated bile acid levels (**f**) in subjects with overweight. Correlations between variables were assessed by linear regression analysis. Linear correlation index R and P values were calculated with two-sided. **g** Heatmap of the correlation between variable gut microbiota and stool unconjugated bile acid levels in lean subjects. Correlation analysis were determined by Spearman's rank test with two-sided. \* $P < 0.05$ , \*\* $P < 0.01$ . **h** Relative abundance of variable gut microbiota at species levels in lean subjects. Mann-Whitney U test with two-sided. Data are presented as mean values +/- SEM in a-c, h. Source data are provided as a Source Data file for Supplementary Figure 1.

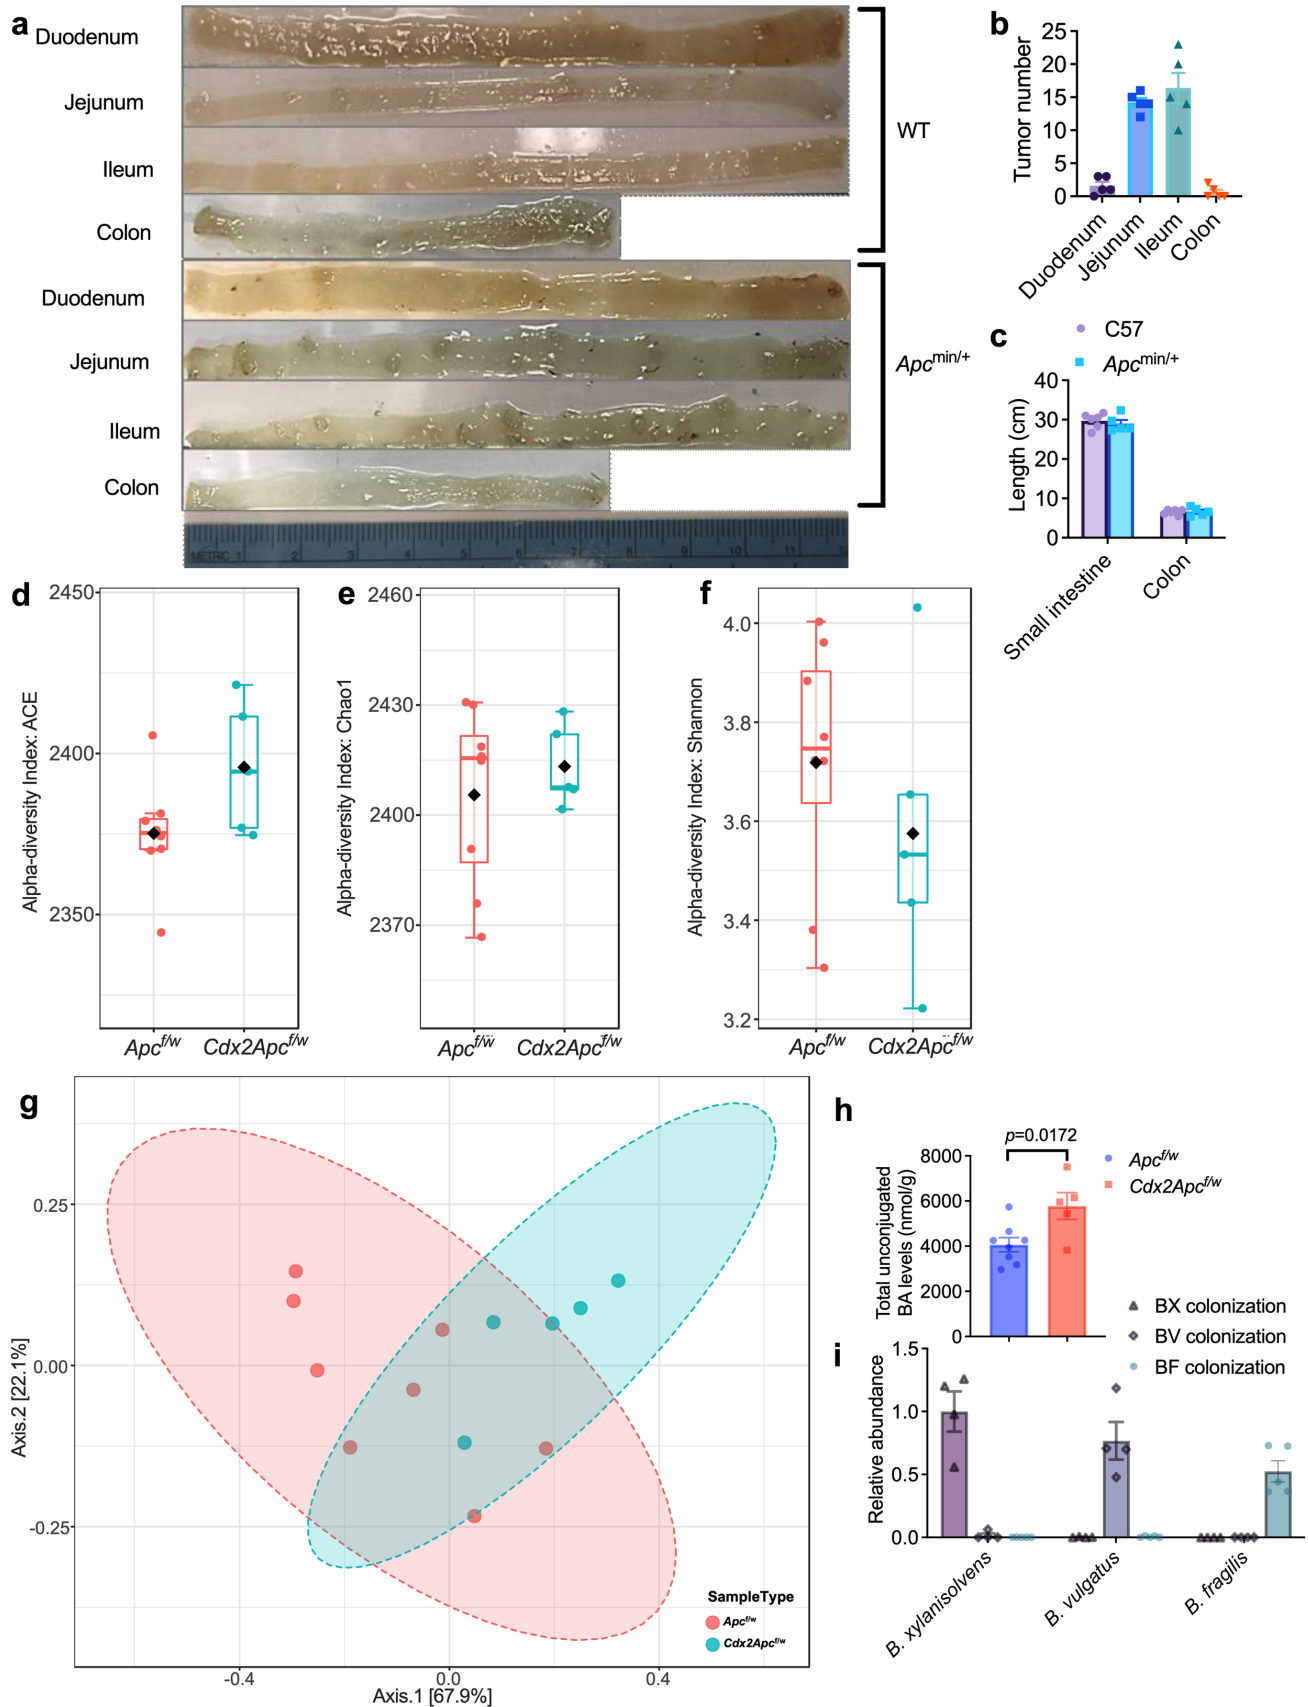



**Supplementary Figure 2: BSH-producing *Bacteroides* species are enriched in CRC mouse model, refers to Fig. 2**

**a-c** C57BL/6J (WT) or *Apc*<sup>min/+</sup> mice were fed a HFD for 8 weeks ( $n = 6$  mice for WT;  $n = 5$  mice for *Apc*<sup>min/+</sup>). **a**, Representative pictures of intestinal segments, indicating the tumor burden. **b** Tumor numbers in different segments of intestine from 5 *Apc*<sup>min/+</sup> mice. **c** Length of small intestine and colon. **d-h** *Apc*<sup>f/w</sup> and *Cdx2Apc*<sup>f/w</sup> mice were fed with HFD for 12 weeks, feces were collected for shotgun metagenomics ( $n = 6$  mice/group). **d-f**  $\alpha$ -diversity of the gut microbiota among four groups, as indicated by the ACE (**d**), Chao1 (**e**) and Shannon indices (**f**). **g** Partial least squares discriminant analysis (PLS-DA) using the Bray-Curtis distance. **h** Total unconjugated bile acid levels in the colon contents. Two-tailed Student's *t* test. **i** Relative abundance of *B. xylanisolvens*, *B. vulgatus* and *B. fragilis* after colonization with each species ( $n = 4$  mice for *B. xylanisolvens* colonization;  $n = 4$  mice for *B. vulgatus* colonization;  $n = 5$  mice for *B. fragilis* colonization). Data are presented as mean values  $\pm$  SEM in b-f, h, i. Source data are provided as a Source Data file for Supplementary Figure 2.

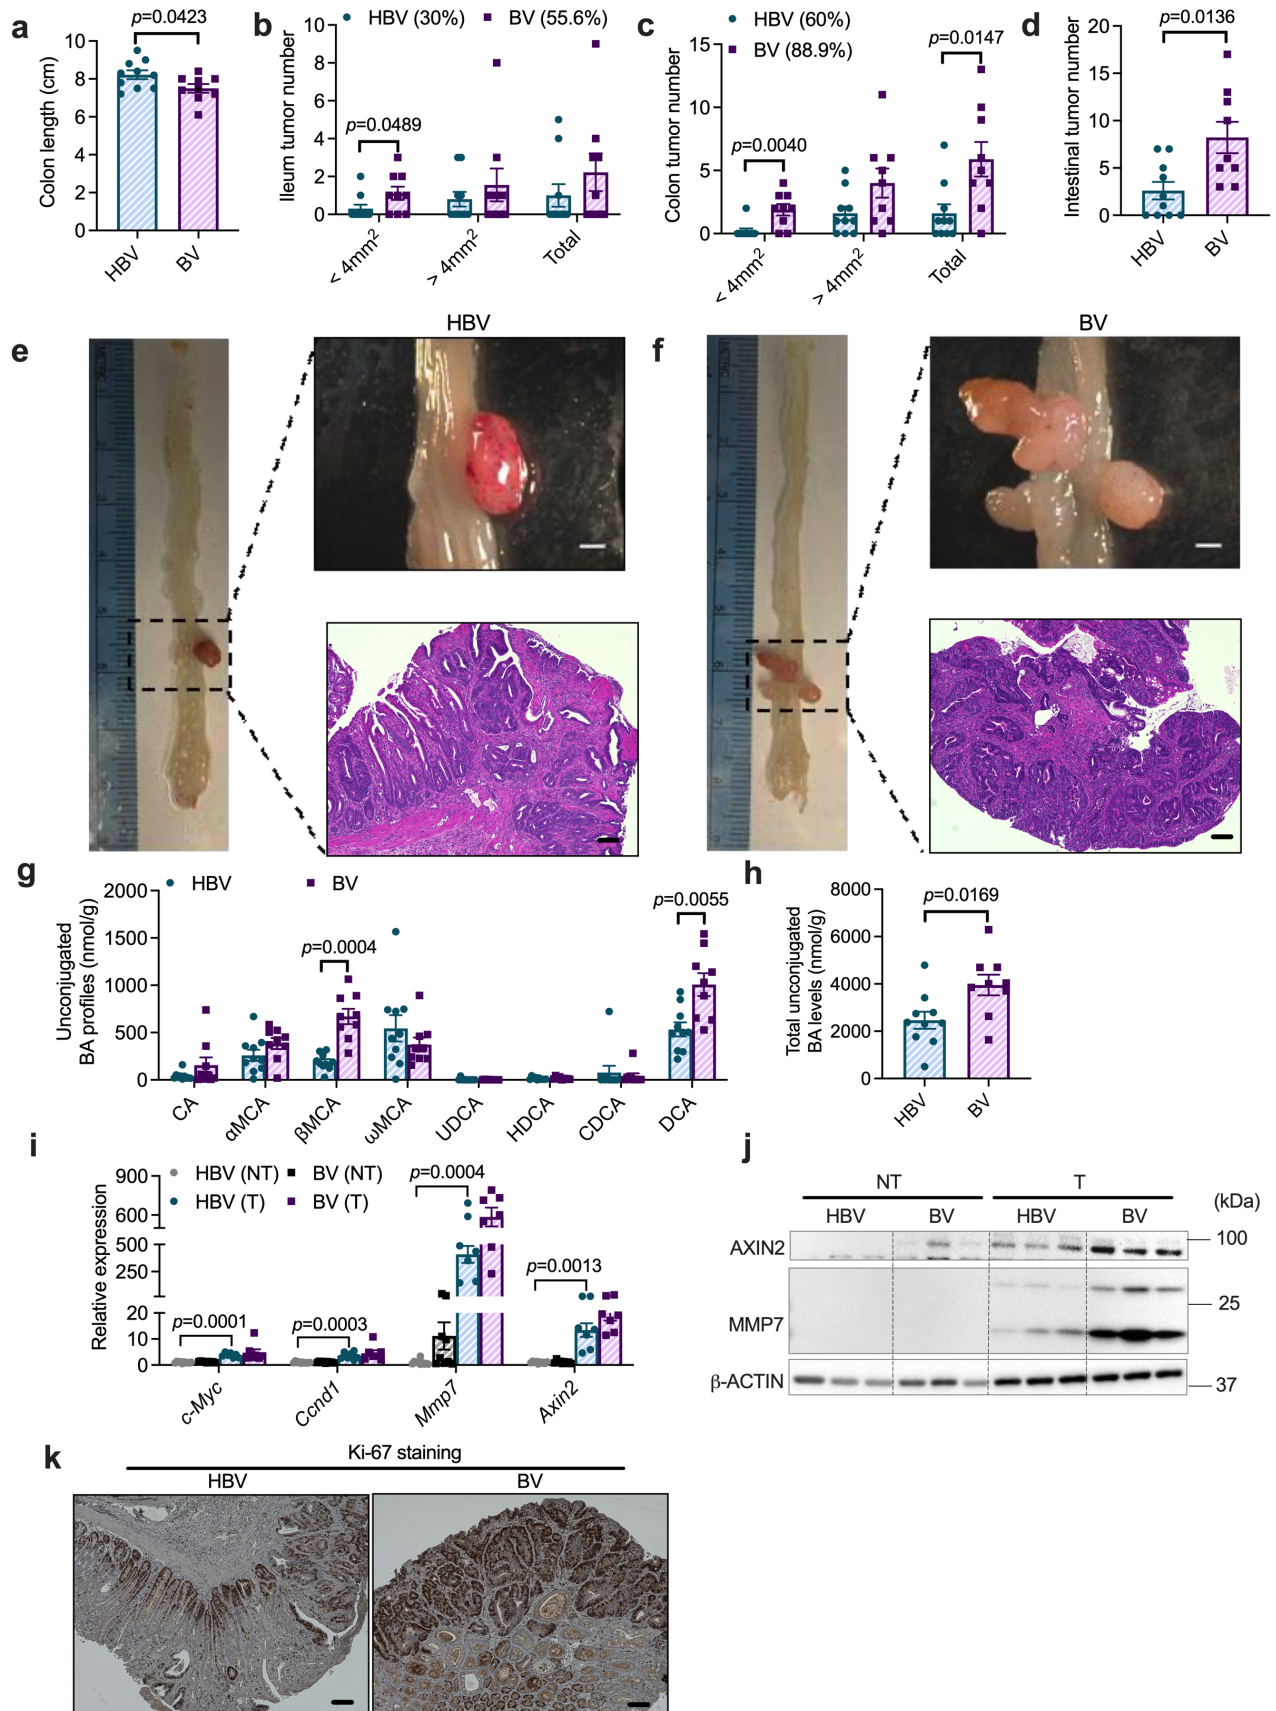

**Supplementary Figure 3: *B. vulgatus* (BV) colonization aggravates CRC progression, refers to Fig. 3**

**a-h** HFD-fed *Cdx2Apc<sup>fl/w</sup>* mice were colonized with heat-killed HBV or BV for 12 weeks ( $n = 10$  mice for HBV;  $n = 9$  mice for BV). **a** Length of colon. **b, c** The ileum (**b**) and (c) colon tumor incidence, and tumor numbers with different sizes ( $<4 \text{ mm}^2$ ,  $>4 \text{ mm}^2$  and the sum of both). Mann-Whitney  $U$  test with two-sided. **d** Total tumor number in the intestine. Two-tailed Student's  $t$  test. **e, f** Representative pictures of colon (left), gross images of tumor (top right) in the colon and H&E staining (bottom right) of colon tumor sections. Scale bars: 1.5 mm (top right) and  $100 \mu\text{m}$  (bottom right). **g** Unconjugated bile acid profiles in the colon contents. Mann-Whitney  $U$  test with two-sided. **h** Total unconjugated bile acid levels in the colon content. Two-tailed Student's  $t$  test. **i** Relative mRNA levels of WNT target genes in colon non-tumor (NT) and tumor (T) tissues ( $n = 10$  for HBV-NT;  $n = 9$  for BV-NT;  $n = 7$  for HBV-T;  $n = 7$  for BV-T). Kruskal-Wallis test with Dunn's post hoc test. **j** WB data of proteins encoded by WNT target genes in colon non-tumor and tumor tissues ( $n = 3$  independent samples/group). **k** Representative IHC staining of Ki-67, a proliferation marker ( $n = 7$  independent slides for HBV;  $n = 9$  independent slides for BV). Scale bars:  $100 \mu\text{m}$ . Data are presented as mean values  $\pm$  SEM in a-d, g-i. Source data are provided as a Source Data file for Supplementary Figure 3.

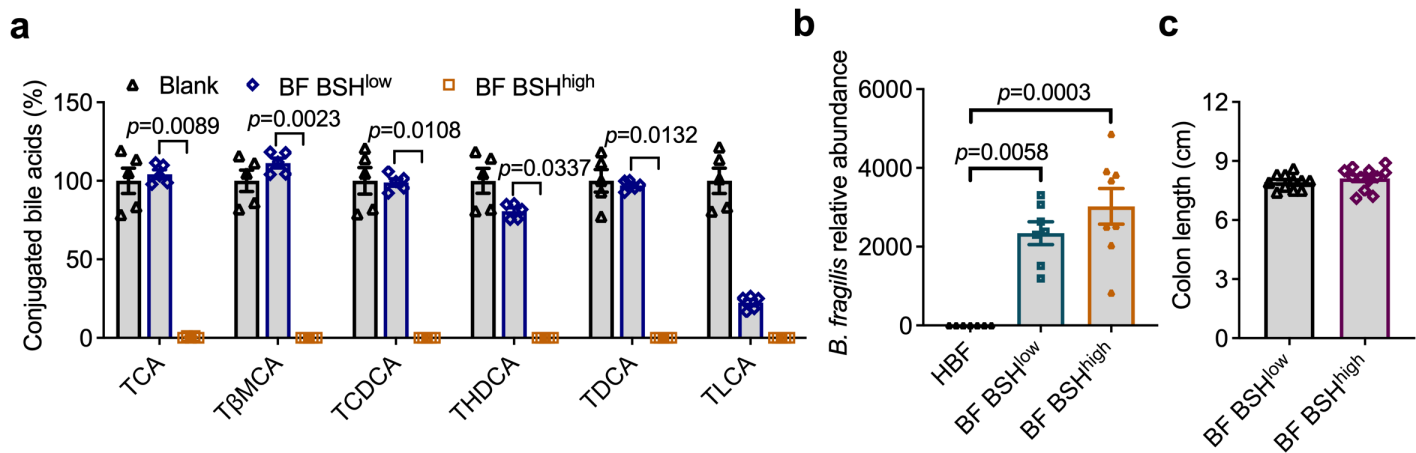

**Supplementary Figure 4: Microbial BSH overexpression in *B. fragilis 638R* (BF638R), refers to Fig. 4 and 5**

**a** Hydrolysis efficiency of conjugated bile acids in the culture medium of blank, WT *B. fragilis 638R* (BF BSH<sup>low</sup>) or BSH-overexpressing *B. fragilis 638R* (BF BSH<sup>high</sup>) ( $n = 5$  technical replicates/group). Kruskal-Wallis test with Dunn's post hoc test. TCA: taurocholic acid; TβMCA: tauro-β-muricholic acid; TCDCA: taurochenodeoxycholic acid; THDCA: taurohyodeoxycholic acid; TDCA: taurodeoxycholic acid; TLCA: tauroolithocholic acid. **b** HFD-fed *Cdx2Apc<sup>f/w</sup>* mice were transplanted with BF BSH<sup>low</sup> or BF BSH<sup>high</sup> for 2 weeks ( $n = 7$  mice for HBF;  $n = 7$  mice for BF BSH<sup>low</sup>;  $n = 8$  mice for BF BSH<sup>high</sup>). Relative abundance of *B. fragilis* after colonization. One-way ANOVA with Tukey's post hoc test. **c** HFD-fed *Cdx2Apc<sup>f/w</sup>* mice were transplanted with BF BSH<sup>low</sup> or BF BSH<sup>high</sup> for 12 weeks ( $n = 11$  mice for BF BSH<sup>low</sup>;  $n = 12$  mice for BF BSH<sup>high</sup>). **c**, The length of colon. Data are presented as mean values +/- SEM in a-c. Source data are provided as a Source Data file for Supplementary Figure 4.

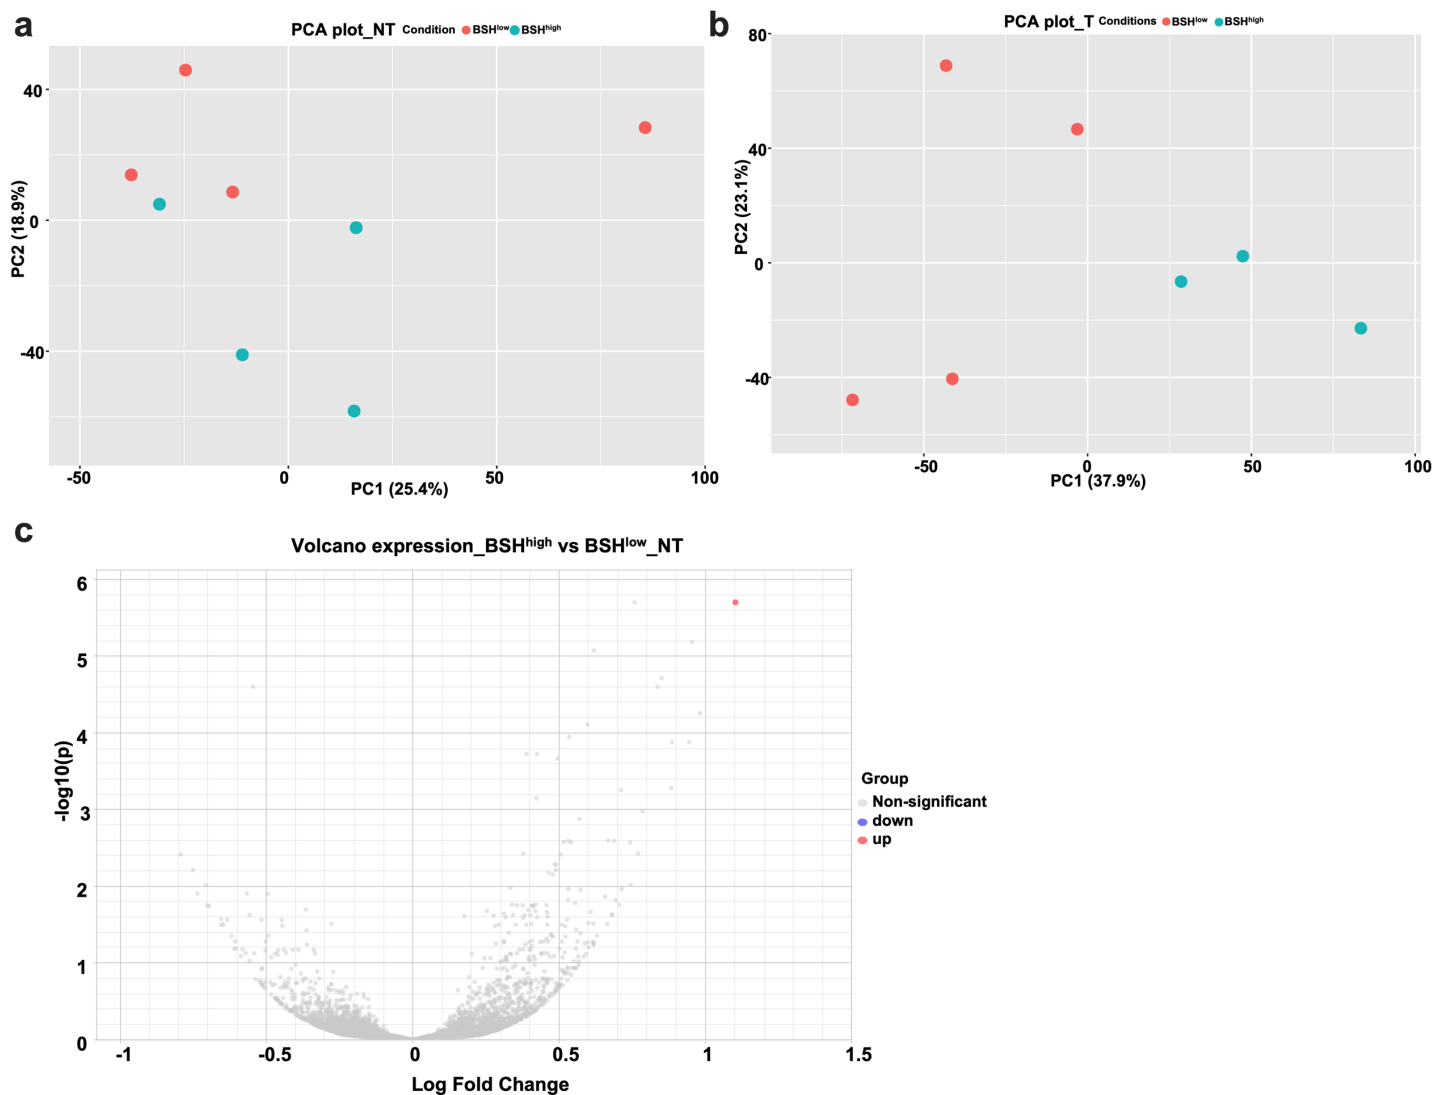

**Supplementary Figure 5: Microbial BSH overexpression in *B. fragilis* change the gene expression profiles in colon cancer tissues, refers to Fig. 6**

**a-c** HFD-fed *Cdx2Apc*<sup>f/w</sup> mice were transplanted with BF BSH<sup>low</sup> or BF BSH<sup>high</sup> for 12 weeks, from which non-tumor (T) and tumor (T) colon tissues were subjected for mRNA sequencing (pooled sample sizes:  $n = 4$  independent samples for BF BSH<sup>low</sup>\_NT;  $n = 4$  independent samples for BF BSH<sup>high</sup>\_NT;  $n = 4$  independent samples for BF BSH<sup>low</sup>\_T;  $n = 3$  independent samples for BF BSH<sup>high</sup>\_T). **a, b** Principal component analysis (PCA) for gene expression in NT (**a**) or T (**b**) tissues from BF BSH<sup>low</sup> or BF BSH<sup>high</sup> groups. **c** Volcano plot showing the expression profiles of genes in NT tissues of BF BSH<sup>low</sup> and BF BSH<sup>high</sup> groups. Red dot (upregulated) was identified as significantly changed gene with an adjust  $P$  value  $< 0.05$  and  $|\log_{2}FC| > 1$ . Two-tailed Student's  $t$  test.

**a**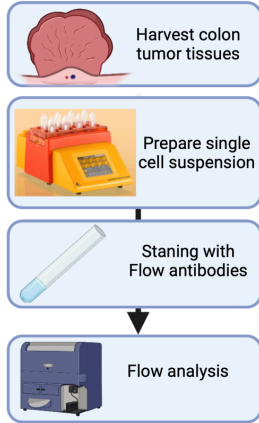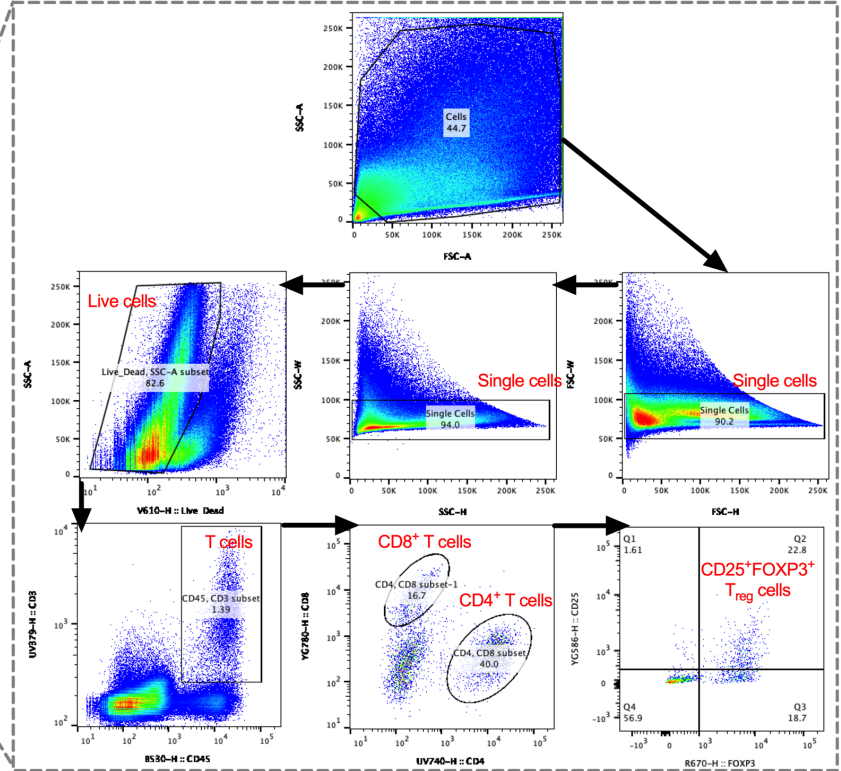**b**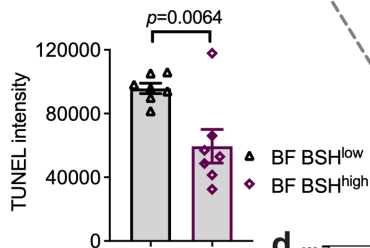**c**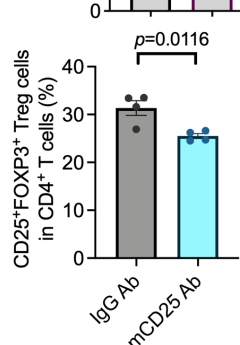**d**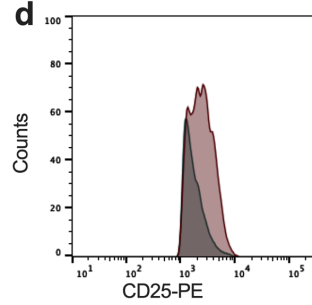**e**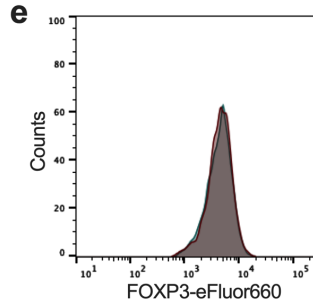**f**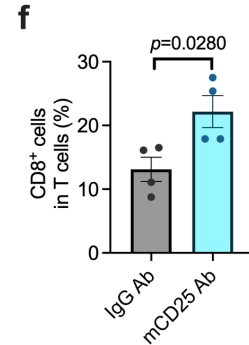**g**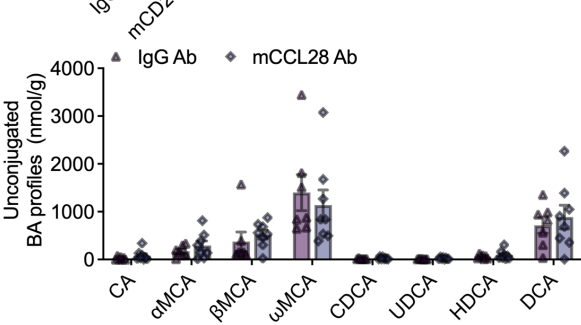**h**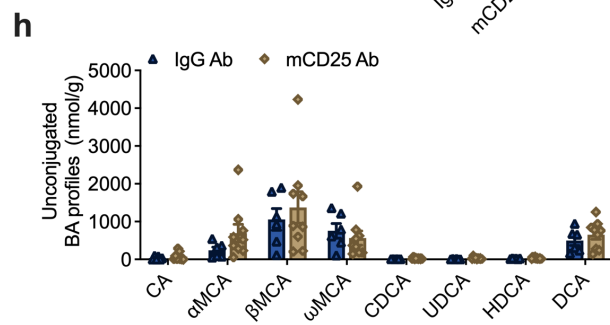**i**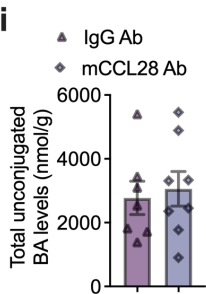**j**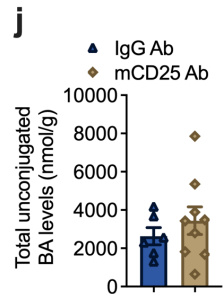**k**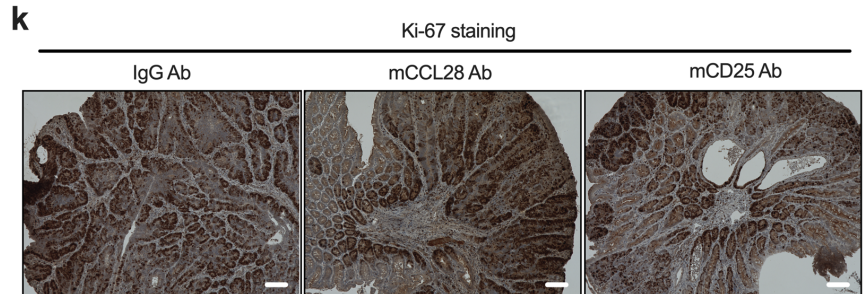

**Supplementary Figure 6: CCL28-induced immunosuppressive effects contributed to *B. fragilis*-accelerated CRC progression, refers to Fig. 6 and 7**

**a** Flow chart that establishes the flow cytometry procedures for analyzing immune properties in colon tumor tissues. Created with BioRender.com. **b** HFD-fed *Cdx2Apc<sup>f/w</sup>* mice were colonized with BF BSH<sup>low</sup> or BF BSH<sup>high</sup> for 12 weeks ( $n = 7$  samples/group). TUNEL intensity. Two-tailed Student's *t* test. **c-f** *Cdx2Apc<sup>f/w</sup>* mice were fed with HFD for 10 weeks, and then the mice were colonized with BF BSH<sup>high</sup> and injected with IgG or mCD25 Ab for another 2 weeks ( $n = 4$  mice/group). The colon tumor tissues were harvested for flow cytometry analysis. **c** The portion of FOXP<sup>+</sup>CD25<sup>+</sup> T<sub>reg</sub> cells in CD4<sup>+</sup> T cells. Two-tailed Student's *t* test. **d, e** CD25 (**d**) and FOXP3 (**e**) intensity in FOXP<sup>+</sup>CD25<sup>+</sup> T<sub>reg</sub> cells. **f** The portion of CD8<sup>+</sup> T cells in total T cells. Two-tailed Student's *t* test. **g-k** HFD-fed *Cdx2Apc<sup>f/w</sup>* mice were fed with HFD for 6 weeks, and then colonized with BF BSH<sup>high</sup> and injected (i.p.) with IgG, mCCL28 Ab or mCD25 Ab neutralizing antibody for another 6 weeks ( $n = 13$  mice for IgG Ab;  $n = 8$  mice for mCCL28 Ab;  $n = 9$  mice for mCD25 Ab). **g, h** Unconjugated bile acid profiles in the colon contents of mCCL28 Ab (**g**) or mCD25 Ab (**h**)-treated mice. **i, j** Total unconjugated bile acid profiles in the colon contents of mCCL28 Ab (**i**) or mCD25 Ab (**j**)-treated mice. **k** Representative IHC staining of Ki-67, a proliferation marker ( $n = 10$  independent slides for IgG Ab;  $n = 7$  independent slides for mCCL28 Ab;  $n = 7$  independent slides for mCD25 Ab). Scale bars: 100  $\mu$ m. Data are presented as mean values  $\pm$  SEM in b, c, f-j. Source data are provided as a Source Data file for Supplementary Figure 6.



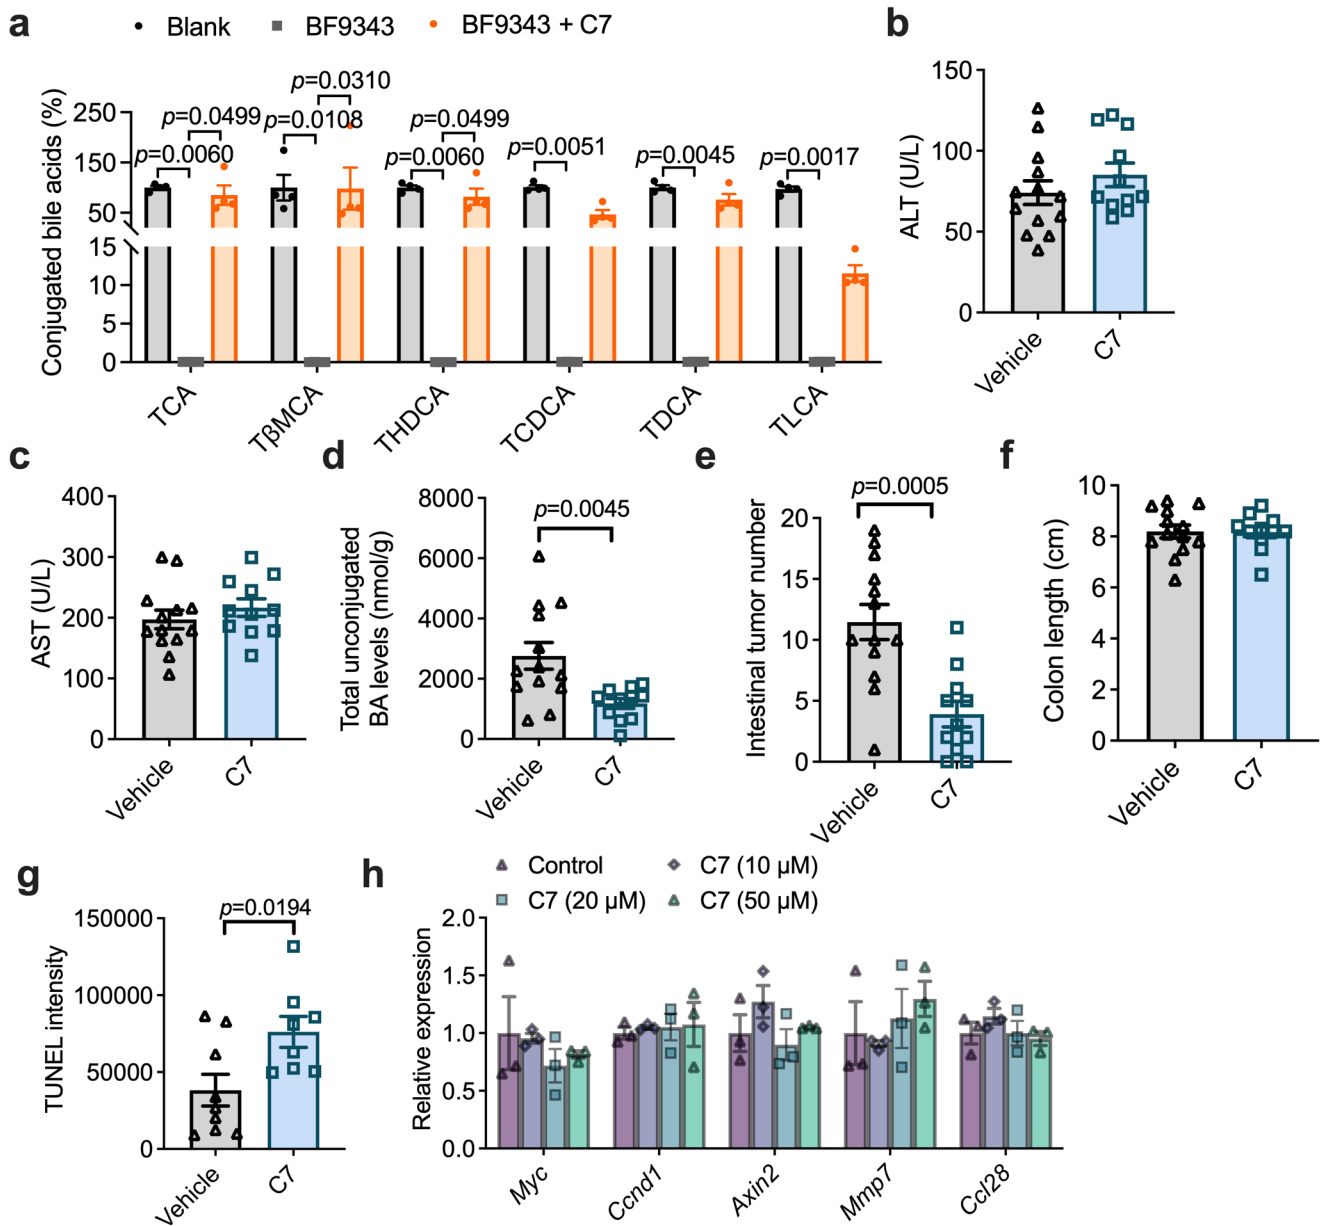

**Supplementary Figure 7: Compound 7 (C7) postposes CRC progression by inhibiting microbial BSH activity, refers to Fig. 8**

**a** *B. fragilis* 9343 (BF9343) were cultured with or without BSH inhibitor, C7 (10 μM), for overnight under conjugated bile acid administration ( $n = 4$  technical replicates/group). Hydrolysis efficiency. Kruskal-Wallis test with Dunn's post hoc test. **b-g** Under BF BSH<sup>high</sup> colonization, *Cdx2Apc<sup>fl/w</sup>* mice were fed with HFD or HFD with C7 (10 mg/kg) for 12 weeks ( $n = 13$  mice for Vehicle;  $n = 11$  mice for C7). **b**, **c** Serum ALT (**b**) and AST (**c**) levels. **d** Total unconjugated bile acids in the colon contents. Two-tailed Student's *t* test. **e** Total tumor numbers in the intestine. Two-tailed Student's *t* test. **f** The length of colon. **g** TUNEL intensity. Two-tailed Student's *t* test. **h** *Cdx2Apc<sup>fl/w</sup>* mice were fed with HFD for over 10 weeks, and then the colon tumors



were used for colon organoids isolation and further culture. Relative expression of  $\beta$ -catenin target genes and Ccl28 under different concentrations of C7 treatment for overnight (n = 3 technical replicates/group). Data are presented as mean values +/- SEM in a-h. Source data are provided as a Source Data file for Supplementary Figure 7.

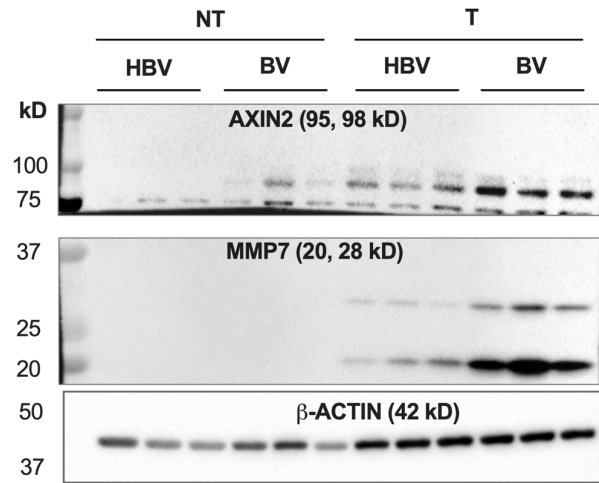

**Supplementary Figure 8: Uncropped gels with markers, refers to Supplementary Fig. 3j**

**Supplementary Table 1: Demographic characteristics for human subjects**

| <b>Patient ID</b> | <b>Group</b>       | <b>BMI</b> | <b>TG (mmol/L)</b> | <b>TC (mmol/L)</b> | <b>ALT (U/L)</b> | <b>AST (U/L)</b> | <b>Tumor Primary Site</b> |
|-------------------|--------------------|------------|--------------------|--------------------|------------------|------------------|---------------------------|
| A1                | Control-Lean       | 24.46      | 1.00               | 5.09               | 11.00            | 14.00            | /                         |
| A2                | Control-Lean       | 22.31      | 0.71               | 6.22               | 12.00            | 17.00            | /                         |
| A3                | Control-Lean       | 23.31      | 1.47               | 6.09               | 14.00            | 19.00            | /                         |
| A4                | Control-Lean       | 21.51      | 0.87               | 4.88               | 19.00            | 20.00            | /                         |
| A5                | Control-Lean       | 22.86      | 0.86               | 4.66               | 15.00            | 19.00            | /                         |
| A6                | Control-Lean       | 24.97      | 0.82               | 4.97               | 10.00            | 17.00            | /                         |
| A7                | Control-Lean       | 22.89      | 2.44               | 5.18               | 7.00             | 17.00            | /                         |
| A8                | Control-Lean       | 22.49      | 1.06               | 4.92               | 10.00            | 13.00            | /                         |
| A9                | Control-Lean       | 24.84      | 1.50               | 4.75               | 17.00            | 17.00            | /                         |
| A10               | Control-Lean       | 19.82      | 0.49               | 4.47               | 9.00             | 16.00            | /                         |
| A11               | Control-Lean       | 22.06      | 1.03               | 4.49               | 25.00            | 21.00            | /                         |
| A12               | Control-Lean       | 21.85      | 0.98               | 4.33               | 12.00            | 19.00            | /                         |
| A13               | Control-Lean       | 23.59      | 0.53               | 4.51               | 22.00            | 19.00            | /                         |
| A14               | Control-Lean       | 18.07      | 0.61               | 5.04               | 14.00            | 23.00            | /                         |
| B1                | Control-Overweight | 25.01      | 1.21               | 4.53               | 16.00            | 17.00            | /                         |
| B2                | Control-Overweight | 30.48      | 1.39               | 4.67               | 28.00            | 35.00            | /                         |
| B3                | Control-Overweight | 25.69      | 1.18               | 5.23               | 20.00            | 25.00            | /                         |
| B4                | Control-Overweight | 27.47      | 1.39               | 4.68               | 18.00            | 34.00            | /                         |
| B5                | Control-Overweight | 27.64      | 1.27               | 4.67               | 16.00            | 17.00            | /                         |
| B6                | Control-Overweight | 26.04      | 2.15               | 5.39               | 15.00            | 17.00            | /                         |
| B7                | Control-Overweight | 31.24      | 2.87               | 5.52               | 17.00            | 21.00            | /                         |
| B8                | Control-Overweight | 33.06      | 1.23               | 5.32               | 33.00            | 34.00            | /                         |
| B9                | Control-Overweight | 32.76      | 1.21               | 5.28               | 22.00            | 29.00            | /                         |
| B10               | Control-Overweight | 33.03      | 2.02               | 4.46               | 29.00            | 42.00            | /                         |
| B11               | Control-Overweight | 29.71      | 4.16               | 7.64               | 40.00            | 63.00            | /                         |
| C1                | CRC-Lean           | 22.65      | 3.84               | 5.53               | 27.00            | 22.00            | Left Colon                |
| C2                | CRC-Lean           | 24.77      | 1.48               | 4.73               | 15.00            | 19.00            | Left Colon                |
| C3                | CRC-Lean           | 19.56      | 0.76               | 3.37               | 6.00             | 12.00            | Right Colon               |
| C4                | CRC-Lean           | 21.88      | 1.35               | 3.85               | 8.00             | 10.00            | Rectum                    |
| C5                | CRC-Lean           | 23.46      | 3.56               | 6.23               | 19.00            | 19.00            | Left Colon                |
| C6                | CRC-Lean           | 22.86      | 1.62               | 3.24               | 20.00            | 19.00            | Rectum                    |
| C7                | CRC-Lean           | 24.09      | 0.99               | 4.41               | 9.70             | 11.80            | Right Colon               |
| C8                | CRC-Lean           | 19.90      | 0.59               | 4.70               | 16.00            | 18.00            | Rectum                    |
| C9                | CRC-Lean           | 20.96      | 0.78               | 2.95               | 10.00            | 14.00            | Left Colon                |
| C10               | CRC-Lean           | 22.99      | 1.17               | 5.10               | 11.00            | 15.00            | Left Colon                |
| C11               | CRC-Lean           | 19.78      | 0.58               | 3.71               | 19.00            | 28.00            | Right Colon               |

|    |                |       |      |      |       |       |             |
|----|----------------|-------|------|------|-------|-------|-------------|
| D1 | CRC-Overweight | 26.04 | 1.09 | 7.13 | 15.00 | 17.00 | Left Colon  |
| D2 | CRC-Overweight | 27.06 | 1.80 | 3.71 | 9.00  | 14.00 | Right Colon |
| D3 | CRC-Overweight | 28.51 | 0.85 | 5.55 | 17.00 | 24.00 | Right Colon |
| D4 | CRC-Overweight | 26.73 | 2.38 | 4.31 | 18.00 | 33.00 | Left Colon  |
| D5 | CRC-Overweight | 25.91 | 1.44 | 4.07 | 14.00 | 25.00 | Left Colon  |
| D6 | CRC-Overweight | 32.51 | 1.68 | 6.61 | 18.00 | 18.00 | Left Colon  |
| D7 | CRC-Overweight | 25.95 | 1.41 | 4.93 | 13.00 | 13.00 | Left Colon  |
| D8 | CRC-Overweight | 30.07 | 1.40 | 4.31 | 13.00 | 16.00 | Rectum      |
| D9 | CRC-Overweight | 32.84 | 1.09 | 5.72 | 10.00 | 15.00 | Left Colon  |

**Supplementary Table 2: Sequences of the real time PCR primers**

| <b>Primers</b>                       | <b>Forward</b>          | <b>Reverse</b>          |
|--------------------------------------|-------------------------|-------------------------|
| <b>Mouse</b>                         |                         |                         |
| <i>Ccnd1</i>                         | GCGTACCCTGACACCAATCTC   | CTCCTCTTCGCACTTCTGCTC   |
| <i>c-Myc</i>                         | ATGCCCCTCAACGTGAACTTC   | CGCAACATAGGATGGAGAGCA   |
| <i>Mmp7</i>                          | CTTACCTCGGATCGTAGTGGA   | CCCCAACTAACCCCTCTTGAAGT |
| <i>Axin2</i>                         | ATGAGTAGCGCCGTGTTAGTG   | GGGCATAGGTTTGGTGGACT    |
| <i>Ccl28</i>                         | GTGTGTGGCTTTTCAAACCTCA  | TGCATGAACTCACTCTTTCCAG  |
| <i>Actin</i>                         | GGCTGTATTCCCCTCCATCG    | CCAGTTGGTAACAATGCCATGT  |
| <b>Bacteria</b>                      |                         |                         |
| <i>Universal</i>                     | TGGAGAGTTTGATCCTGGCTCAG | TACCGCGGCTGCTGGCAC      |
| <i>B. fragilis</i>                   | CGGATGCCATTGATAAAGTAGG  | CTGGAAGCAAGCACATTAGC    |
| <i>B. vulgatus</i>                   | CGGGCTTAAATTGCAGATGA    | CATGCAGCACCTTCACAGAT    |
| <i>BF9343_1433</i><br>( <i>Bsh</i> ) | GAGTGGTCTATTCCTTGGGG    | GGATCGCTGCAGGTGCAC      |
| <i>B. xylanisolvens</i>              | GTGAAGGTGCTGCATGGTTG    | TGGGATTAGCATCCTGTCCG    |

**Supplementary Table 3: Bacterial strains and plasmids used in this study**

| <b>Strains</b>                           | <b>Genotype</b>                                                                                                                                                                                                       |
|------------------------------------------|-----------------------------------------------------------------------------------------------------------------------------------------------------------------------------------------------------------------------|
| <i>B. vulgatus</i>                       | appendix abscess                                                                                                                                                                                                      |
| <i>B. fragilis</i> 638R                  | clinical isolate, Rif <sup>r</sup>                                                                                                                                                                                    |
| <i>B. fragilis</i> ATCC 25285 (NCTC9343) | appendix abscess                                                                                                                                                                                                      |
| BER-154                                  | 638R carrying pNBU2- <i>bla-ermGb</i> , Rif <sup>r</sup> Erm <sup>r</sup>                                                                                                                                             |
| BER-182                                  | 638R carrying pER-300 Rif <sup>r</sup> Erm <sup>r</sup>                                                                                                                                                               |
| <i>E. coli</i> S17-1 $\lambda$ pir       | Strain with the RK2 <i>tra</i> genes for conjugative transfer integrated in the chromosome ( <i>RP4-2-Tc::Mu-Km::Tn7, pro, res-mod+</i> , Tp <sup>r</sup> Sm <sup>r</sup> ) $\lambda$ pir lysogen)                    |
| <b>Plasmids</b>                          |                                                                                                                                                                                                                       |
| pNBU2- <i>bla-ermGb</i>                  | NBU2 integrase ( <i>intN2</i> ) based genomic insertion vector derived from pKNOCK- <i>bla-ermGb</i> inserts into NBU2 <i>att1</i> or <i>att2</i> sites of tRNA <sup>ser</sup> , (Amp <sup>r</sup> ) Erm <sup>r</sup> |
| pER-300                                  | A 1,569 bp DNA fragment containing entire <i>bsh</i> operon (BF9343_1433) was cloned into the XbaI/PstI sites of pNBU2- <i>bla-ermGb</i> , (Amp <sup>r</sup> ) Erm <sup>r</sup>                                       |

Erm<sup>r</sup>: erythromycin resistance; Rif<sup>r</sup>: rifampicin resistance; Amp<sup>r</sup>: Ampicillin resistance. Parenthesis indicates antibiotic resistance expression in *E. coli*. ATCC: American Type Culture Collection. NCTC: National Collection of Type Cultures, England.
