# Supplementary material for: Bile salt hydrolase in non-enterotoxigenic Bacteroides potentiates colorectal cancer
Source: PubMed Central journal article supplement (PMC9918522; doi:10.1038/s41467-023-36089-9), 2023-02-10
Supplement: 41467_2023_36089_MOESM2_ESM.pdf [file 41467_2023_36089_MOESM2_ESM.pdf]

## **Description of Additional Supplementary Files**

**Supplementary Data 1:** human shotgun metagenomics outputs

**Supplementary Data 2:** Mouse shotgun metagenomics outputs

**Supplementary Data 3:** Bulk mRNA-seq output
